# Supplementary material
Source: publisher figshare collection journal article supplement (https://acs.figshare.com/ndownloader/files/4742476)
Supplement: Supplementary file 1 [file 4742476]

# Monte Carlo Simulations of End-Adsorption of Head-to-Tail Reversibly Associated Polymers: Supplementary Materials

Chun-Chung Chen and Elena E. Dormidontova

## Bulk properties

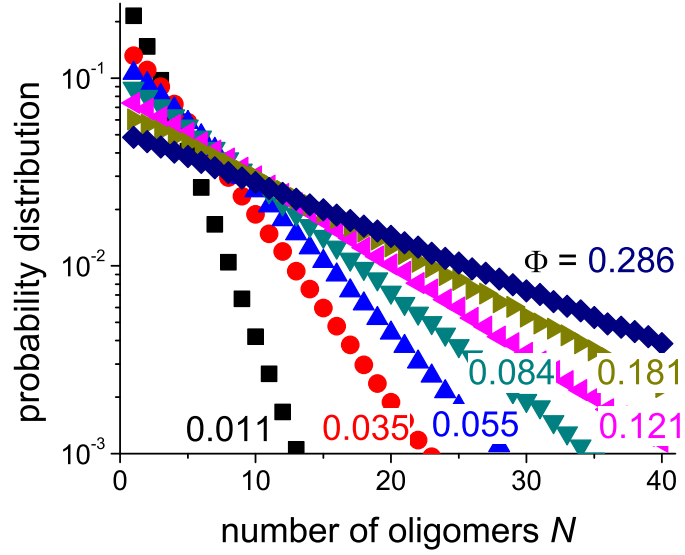

Chain length distribution for reversible associated polymers in the bulk for various polymer volume fractions  $\Phi$ . Ring species are excluded from the calculation.

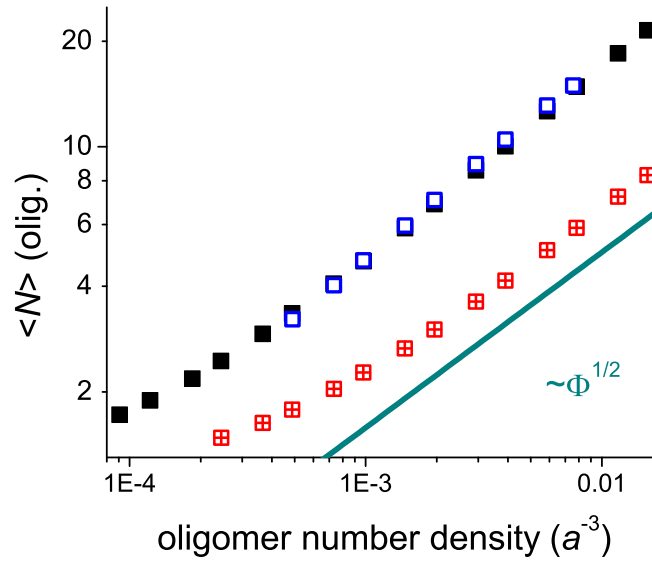

Average number of oligomers per chain as a function of oligomer number density (the total number of oligomers divided by the volume of the system). Solid (open) symbols are for the oligomer length 4 (8) and the energy of association  $10kT$ , crossed symbols are for the oligomer length 4 and the energy of association  $8kT$ .

## Conformation of adsorbed chains

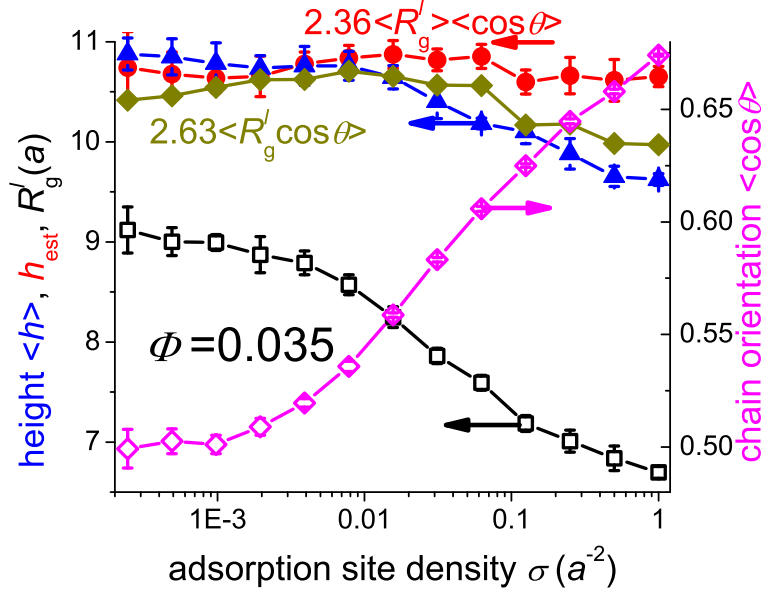

Average height of the adsorbed polymer layer (triangles) for the polymer bulk volume fraction  $\Phi = 0.035$  as a function of adsorption site density in comparison with  $h_{\text{est}} = 2.36 \langle R_g^l \rangle \langle \cos \theta \rangle$  (circles) and  $h_{\text{est}} = 2.63 \langle R_g^l \cos \theta \rangle$  (dimonds). The long axis component of the radius of gyration  $\langle R_g^l \rangle$  is shown as open squares, whereas  $\langle \cos \theta \rangle$  characterizing the chain orientation with respect to the surface normal is shown as open diamonds (right axis).

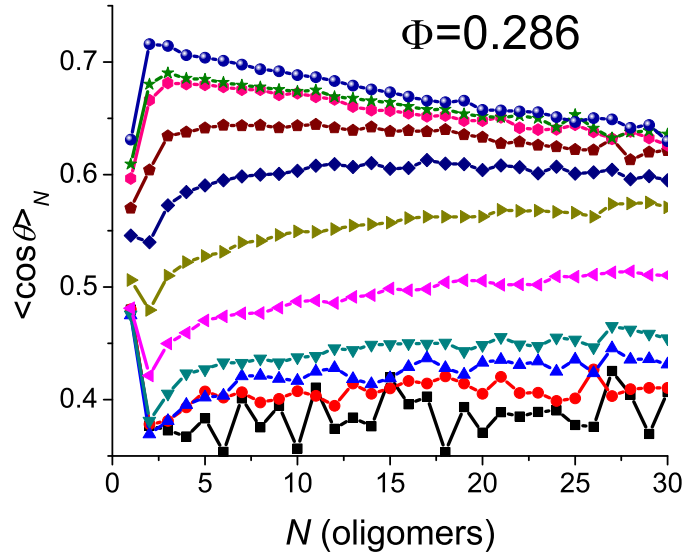

Average orientation  $\langle \cos \theta \rangle$  of adsorbed polymer long axis with respect to the surface normal as a function of the number of oligomers in an adsorbed chain for different adsorption site densities ( $\sigma = 2.44 \times 10^{-4} a^{-2}$  to  $\sigma = 1 a^{-2}$  from bottom to top) for  $\Phi = 0.286$ .
